# Supplementary material
Source: PubMed Central journal article supplement (PMC4073434)
Supplement: ASN.2013080837_ASN2013080837SupplementaryData.pdf [file ASN.2013080837_ASN2013080837SupplementaryData.pdf]

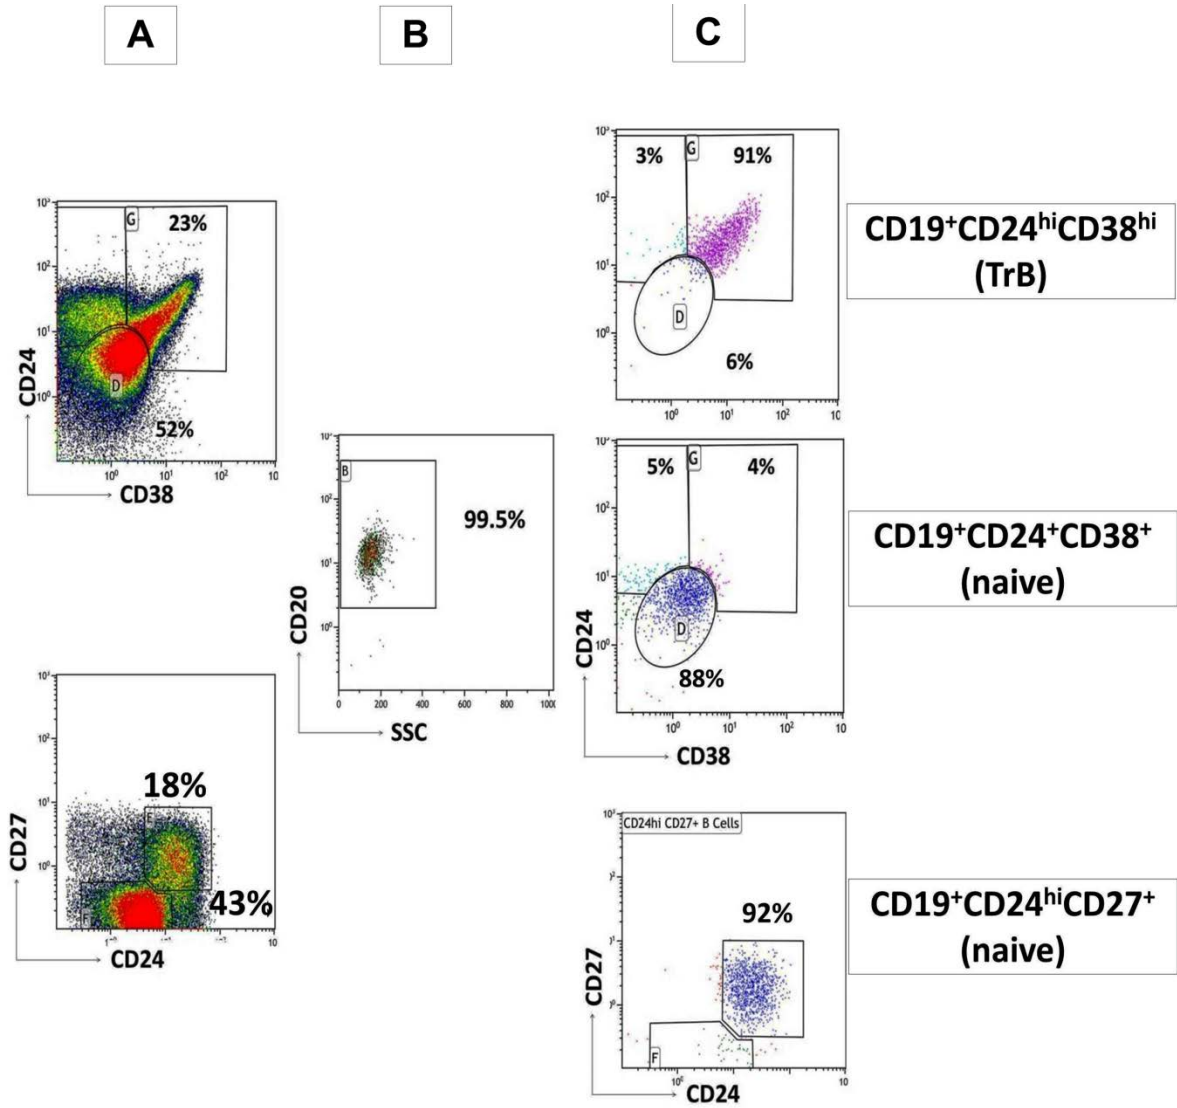

**Figure-S1: Representative sort gates and purities for B cell subsets.**

- (A) Dot plots showing B cell subsets prior to cell sorting (CD19 gate)
- (B) Post-sort purity of CD19+ cells (lymphocyte gate)
- (C) Post-sort purities of B cell subsets (CD19 gate)

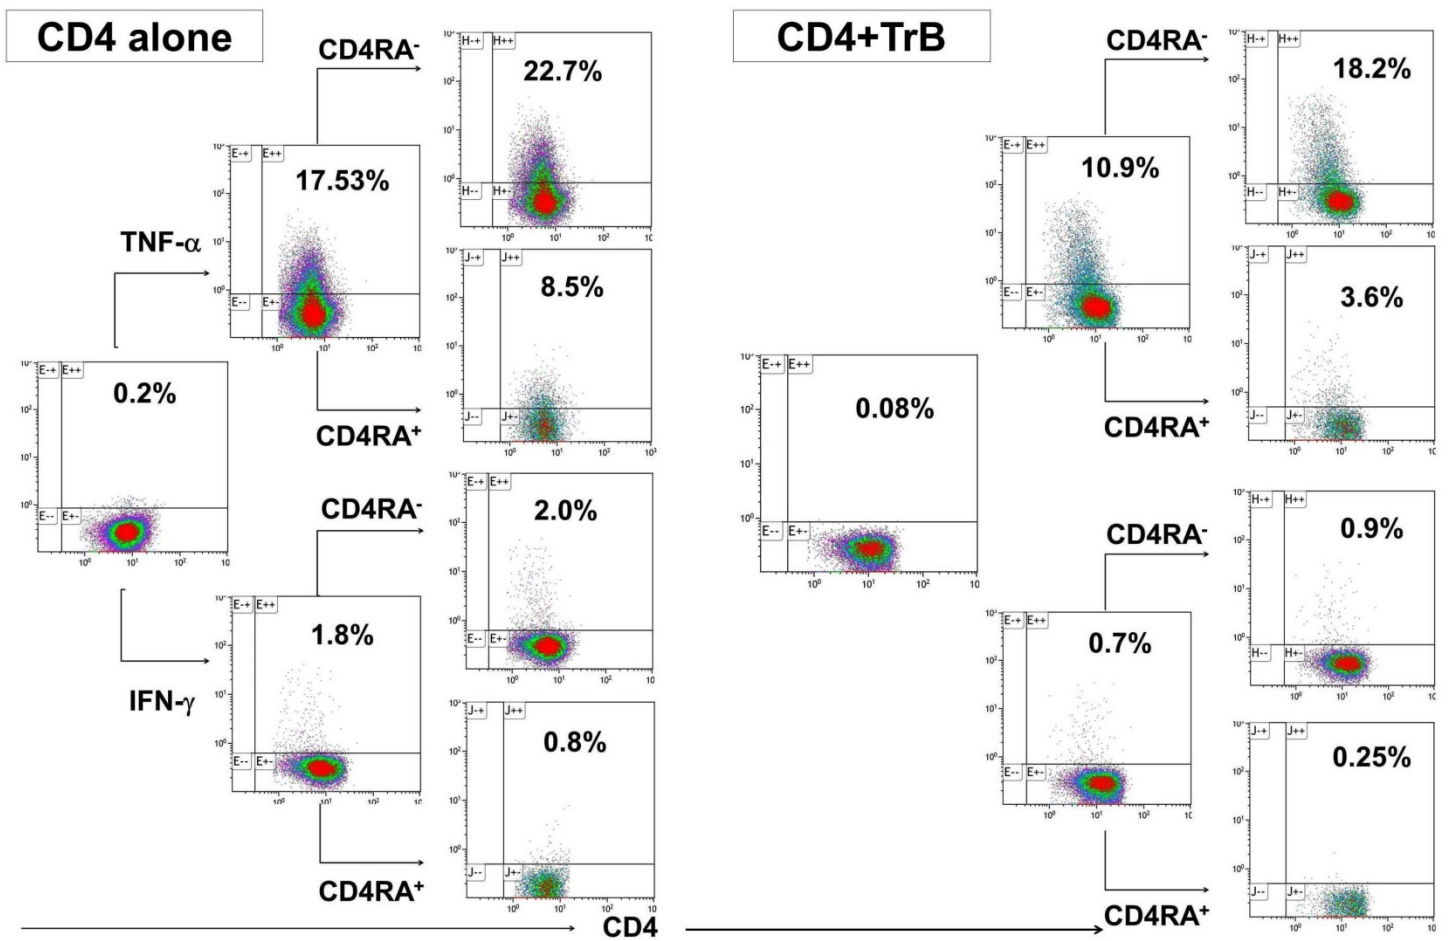

**Figure-S2: Effect of TrB on CD45RA<sup>+</sup> and CD45RA<sup>-</sup> CD4 Tconv cells**

Representative scatter plot showing the expression of TNF- $\alpha$  and IFN- $\gamma$  by CD45RA<sup>+</sup> and CD45RA<sup>-</sup> Tconv when stimulated for 72hrs by plate bound anti human CD3 when cultured alone or in the presence of autologous TrB (n=3).

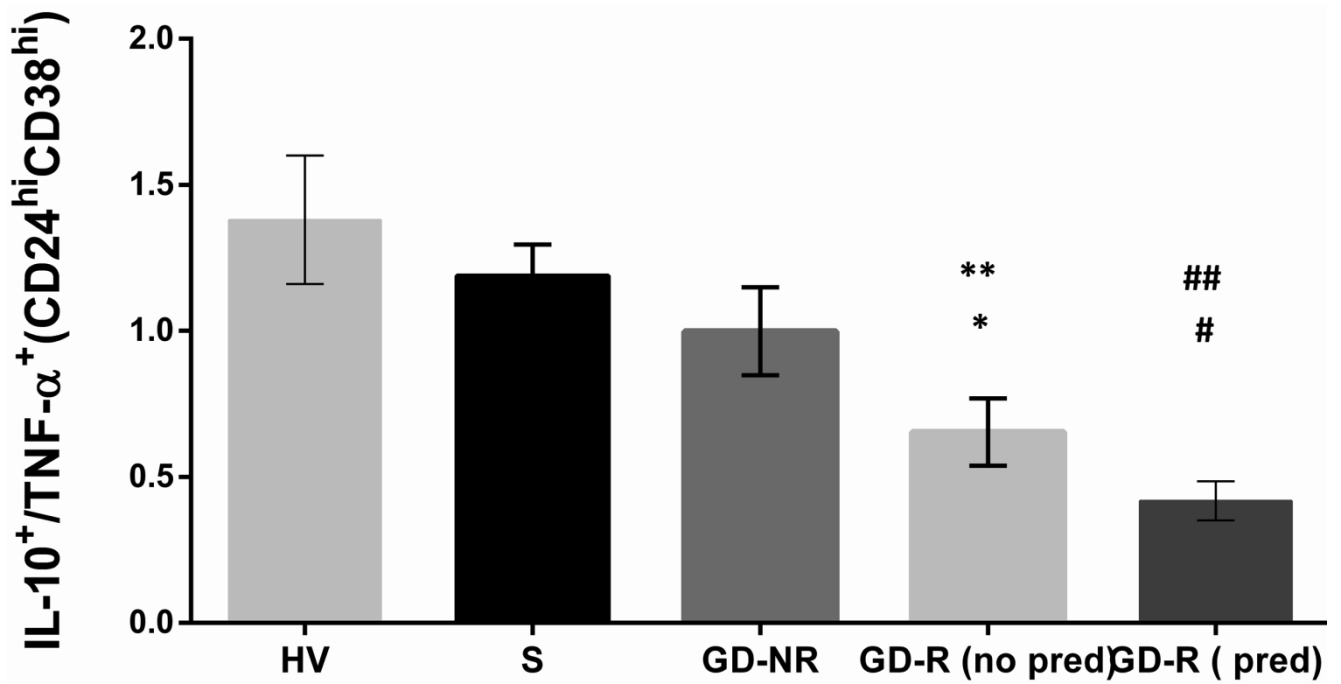

**Figure-S3: IL-10/TNF- $\alpha$  ratio for TRB cells patient groups-influence of maintenance corticosteroids**

Pred- maintenance corticosteroids, no pred- no maintenance corticosteroids

\*S vs. GD-R (no pred), P=0.02; \*\*S vs. GD-R (pred), P=0.0002; #GD-NR vs. GD-R (no pred), P=0.1;

##GD-NR vs. GD-R (pred), P=0.008

**A**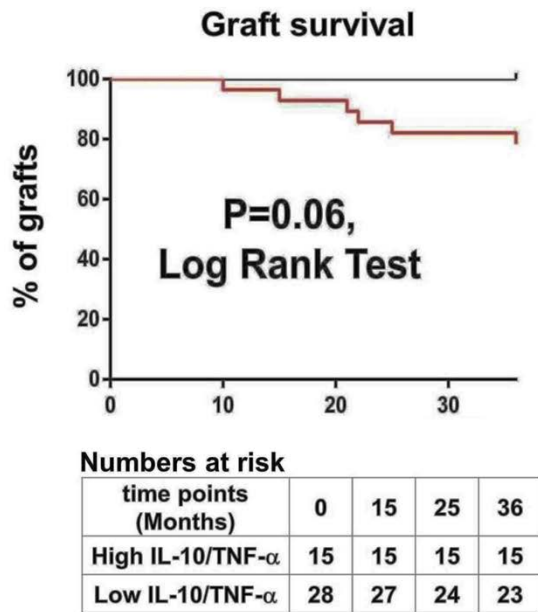**B**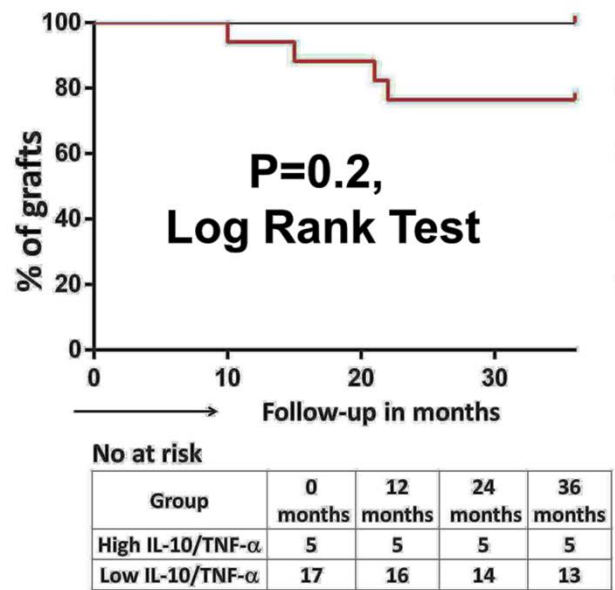

**Figure-S4: Graft survival in patients with graft dysfunction and rejection**

(A) Kaplan Meier survival curves for the high and low IL-10/TNF- $\alpha$  (TrB) for graft loss over 3 years in patients with (A) graft dysfunction and (B) rejection (GD-R group).
